# Supplementary material for: Effect of Baricitinib and Adalimumab in Reducing Pain and Improving Function in Patients with Rheumatoid Arthritis in Low Disease Activity: Exploratory Analyses from RA-BEAM
Source: MDPI journal article supplement (doi:10.3390/jcm8091394), 2019-09-05
Supplement: s1 [file s1]

**Supplementary Table S1.** Work-related patient-reported outcomes at week 24 according to remission status in working patients from RA-BEAM.

| PRO Measure                                                                   | n   | Baseline | Mean Value at Week 24 | Observed Change at week 24                                                               | n   | Baseline | Mean Value at Week 24 | Observed Change at Week 24                                                         | n   | Baseline | Mean Value at Week 24 | Observed Change at Week 24 |
|-------------------------------------------------------------------------------|-----|----------|-----------------------|------------------------------------------------------------------------------------------|-----|----------|-----------------------|------------------------------------------------------------------------------------|-----|----------|-----------------------|----------------------------|
| <b>Patients in remission on placebo (n = 24)</b>                              |     |          |                       | <b>Patients in remission on baricitinib 4 mg (n = 87)</b>                                |     |          |                       | <b>Patients in remission on adalimumab (n = 57)</b>                                |     |          |                       |                            |
| Absenteeism (%)                                                               | 10  | 7.1      | 4.3                   | -2.8                                                                                     | 34  | 5.2      | 5.9                   | 0.7                                                                                | 34  | 4.1      | 1.5                   | -2.5                       |
| Present at work (%)                                                           | 10  | 22.0     | 11.0                  | -11.0                                                                                    | 34  | 45.9     | 9.7                   | -36.2                                                                              | 34  | 33.5     | 11.5                  | -22.1                      |
| Productivity loss (%)                                                         | 10  | 24.8     | 13.1                  | -11.7                                                                                    | 34  | 47.7     | 14.1                  | -33.6                                                                              | 34  | 35.3     | 13.0                  | -22.3                      |
| Activity impairment (%)                                                       | 24  | 37.5     | 17.5                  | -20.0                                                                                    | 87  | 52.1     | 14.4                  | -37.7                                                                              | 57  | 41.2     | 14.6                  | -26.7                      |
| <b>Patients in remission or low disease activity on placebo (n = 46)</b>      |     |          |                       | <b>Patients in remission or low disease activity on baricitinib 4 mg (n = 154)</b>       |     |          |                       | <b>Patients in remission or low disease activity on adalimumab (n = 110)</b>       |     |          |                       |                            |
| Absenteeism (%)                                                               | 21  | 3.5      | 4.4                   | 0.9                                                                                      | 66  | 5.9      | 6.8                   | 0.9                                                                                | 62  | 5.9      | 5.3                   | -0.5                       |
| Present at work (%)                                                           | 21  | 33.8     | 16.2                  | -17.6                                                                                    | 66  | 43.0     | 13.2                  | -29.8                                                                              | 61  | 37.4     | 13.8                  | -23.6                      |
| Productivity loss (%)                                                         | 21  | 35.2     | 19.1                  | -16.1                                                                                    | 66  | 45.6     | 18.7                  | -26.9                                                                              | 61  | 39.7     | 15.9                  | -23.8                      |
| Activity impairment (%)                                                       | 46  | 43.5     | 20.0                  | -23.5                                                                                    | 154 | 52.7     | 15.9                  | <b>-36.8*</b>                                                                      | 110 | 47.3     | 17.0                  | -30.3                      |
| <b>Patients not in remission or low disease activity on placebo (n = 276)</b> |     |          |                       | <b>Patients not in remission or low disease activity on baricitinib 4 mg (n = 267) ‡</b> |     |          |                       | <b>Patients not in remission or low disease activity on adalimumab (n = 157) ¶</b> |     |          |                       |                            |
| Absenteeism (%)                                                               | 111 | 14.5     | 11.0                  | -3.5                                                                                     | 94  | 15.0     | 9.2                   | -5.8                                                                               | 48  | 19.5     | 10.2                  | -9.3                       |
| Present at work (%)                                                           | 102 | 45.4     | 37.2                  | -8.2                                                                                     | 87  | 45.5     | 31.6                  | <b>-13.9 *</b>                                                                     | 44  | 54.8     | 35.9                  | <b>-18.9 *</b>             |
| Productivity loss (%)                                                         | 102 | 48.3     | 41.3                  | -7.0                                                                                     | 87  | 48.9     | 34.6                  | <b>-14.3 **</b>                                                                    | 44  | 58.2     | 39.8                  | <b>-18.4 *</b>             |
| Activity impairment (%)                                                       | 276 | 57.6     | 42.7                  | -15.0                                                                                    | 266 | 60.3     | 36.4                  | <b>-23.9 ***</b>                                                                   | 156 | 63.7     | 40.8                  | <b>-22.8 *</b>             |

At baseline, 41–43% of patients from RA-BEAM reported being employed. Remission was defined as DAS28-ESR <2.6 and low disease activity as DAS28-ESR ≥2.6 and ≤3.2. Numbers in bold are significantly different compared with placebo. *BARI* baricitinib, *DAS28-ESR* Disease Activity Score for 28-joint count with erythrocyte sedimentation rate, *MTX* methotrexate, *PRO* patient-reported outcome. ‡One patient was missing from the BARI+MTX group. ¶One patient was missing from the ADA+MTX group. \*  $p < 0.05$ , \*\*  $p < 0.01$ , \*\*\*  $p < 0.001$  vs. place.
